# Supplementary material for: Spatial compartmentation and food web stability
Source: PubMed Central journal article supplement (PMC6215003; doi:10.1038/s41598-018-34716-w), 2018-11-02

## **Supplementary Information**

### **Spatial compartmentation and food web stability**

**A. Mougi**

## Supplementary Figures

To examine the robustness of the results in Fig. 2a and 2b, I used different stability index, network topology, connectance, or species richness. First, the stability is evaluated by resilience (engineering resilience), namely, the rate of recovery to original equilibrium after a small perturbation, which is calculated by the mean magnitude of the real part of the dominant eigenvalue of  $J$  across 1000 samples of locally stable communities (Fig. S1). Second, cascade model is used as other network type (Fig. S2). In the cascade model, for each pair of species,  $i, j = 1, \dots, n$  with  $i < j$ , species  $i$  never consumes species  $j$ , whereas species  $j$  may consume species  $i$ . Third, different values of  $C$  (Fig. S3) and  $N$  (Fig. S4) are considered. Even if I change these factors, we can see that the results in Fig. 2a, b are qualitatively unchanged. However, in larger  $N$ , larger  $M$  tends to decrease the stability than in smaller  $N$ .

In addition to these changes, I relax strong assumptions of symmetry of parameters. First is the proportions of migratory species in sub-food webs ( $p_1 = p_3 = p$  in the main text). As shown in Fig. S5, even if the change of  $p_1$  ( $p_3$  is fixed) almost do not affect the result. Second is the community sizes of each original habitat, which are controlled by the proportion of species in sub-food web 1,  $q_1$  ( $q_3 = 1 - q_1$ ). In the main text,  $q_1 = q_3 = q$ . As shown in Fig. S6, even if the change of  $q_1$  ( $q_3$  is fixed) almost do not affect the result.

**Fig. S1.** Relationships between spatial coupling strength and resilience with varying proportions of migratory species. (a) Boundary-separated subsystems. (b) Globally-connected subsystems. Other information is the same as in Fig. 2a, b.

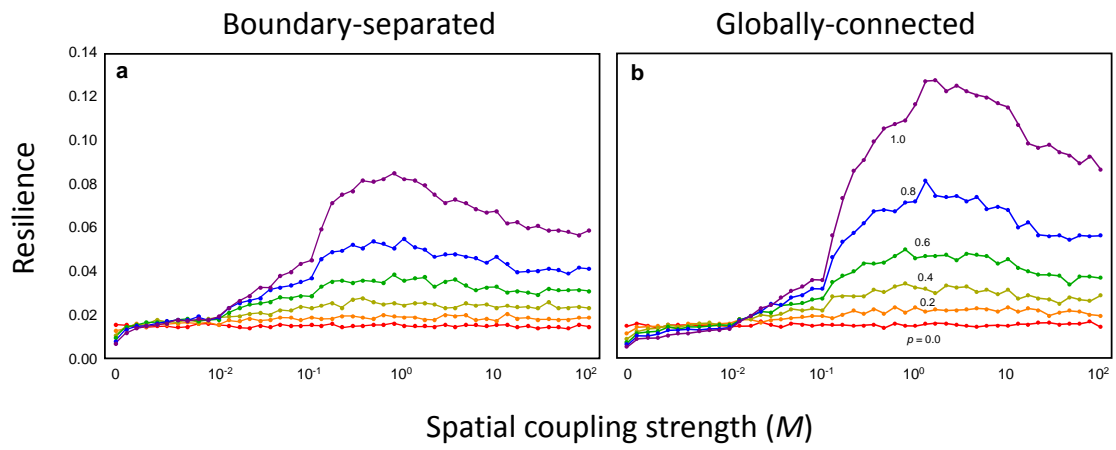

**Fig. S2.** Relationships between spatial coupling strength and stability with varying proportions of migratory species in a cascade model. (a) Boundary-separated subsystems. (b) Globally-connected subsystems. Other information is the same as in Fig. 2a, b.

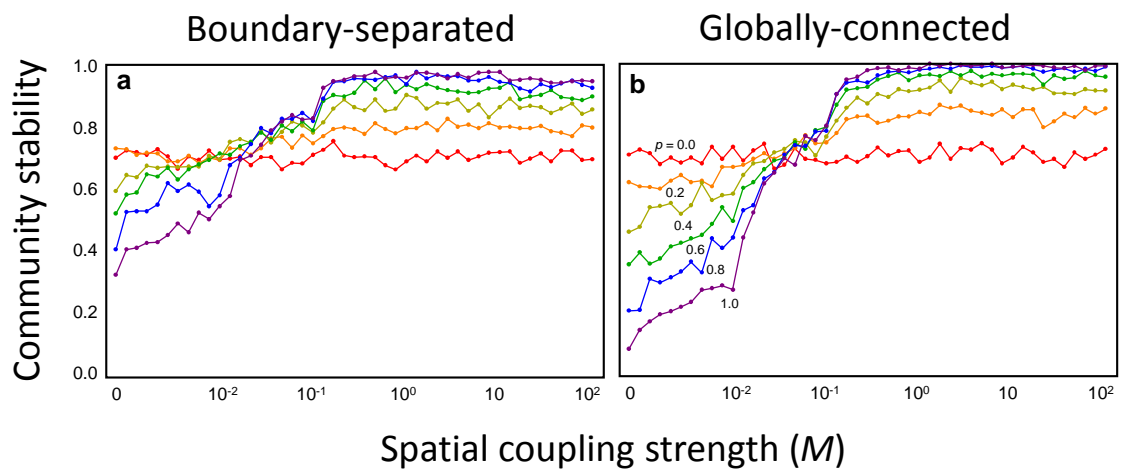

**Fig. S3.** Relationships between spatial coupling strength and stability with varying proportions of migratory species. (a, b) Boundary-separated subsystems. (c, d) Globally-connected subsystems. In (a) and (c),  $C = 0.75$ . In (b) and (d),  $C = 0.25$ . Other information is the same as in Fig. 2a, b.

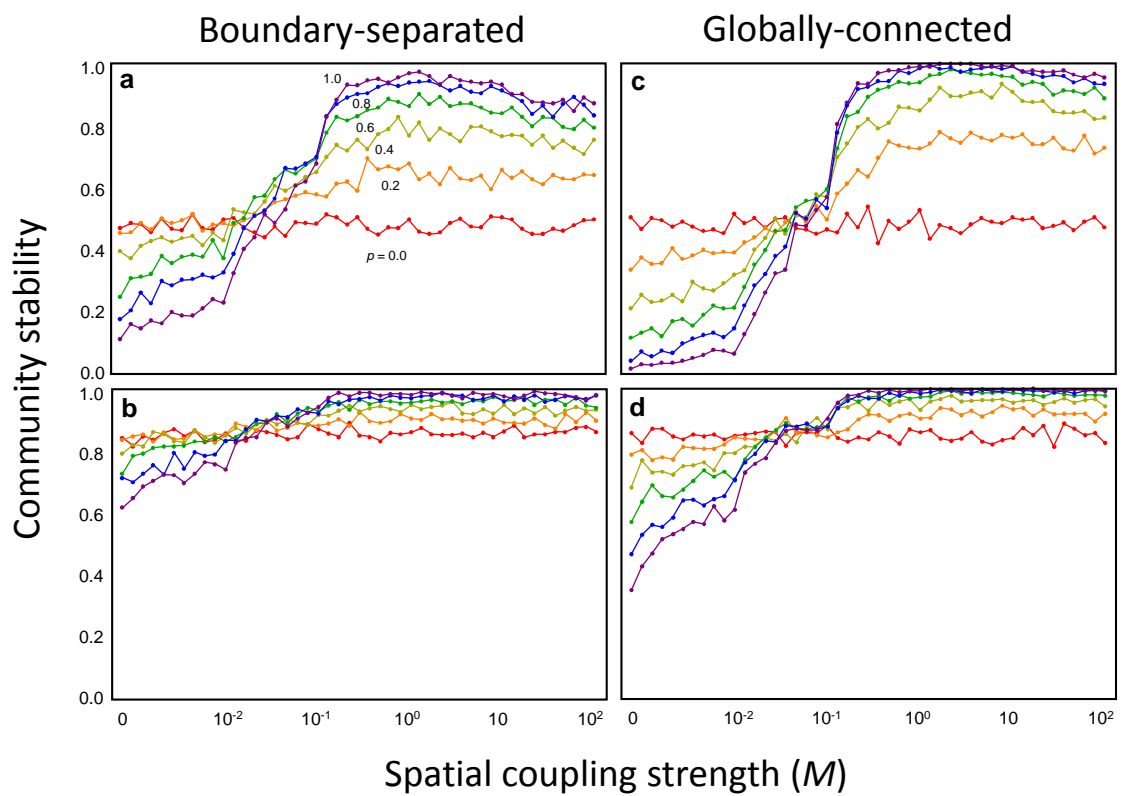

**Fig. S4.** Relationships between spatial coupling strength and stability with varying proportions of migratory species. (a, b) Boundary-separated subsystems. (c, d) Globally-connected subsystems. In (a) and (c),  $N = 100$ . In (b) and (d),  $N = 20$ . Other information is the same as in Fig. 2a, b. Note that the stability almost does not change even in  $M = 10^{10}$ .

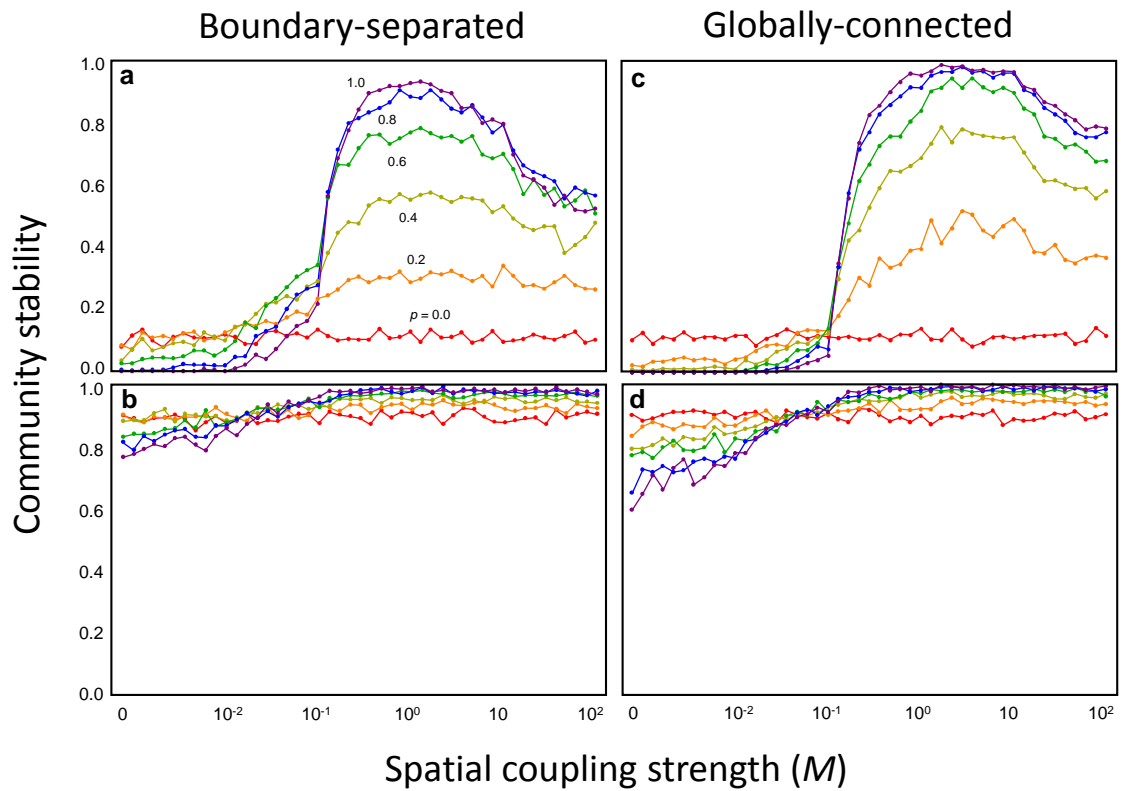

**Fig. S5.** Relationships between spatial coupling strength and stability with varying proportions of migratory species in a patch 1 ( $p_1$ ). (a) Boundary-separated subsystems. (b) Globally-connected subsystems.  $p_2 = 0.5$ . Other information is the same as in Fig. 2a, b.

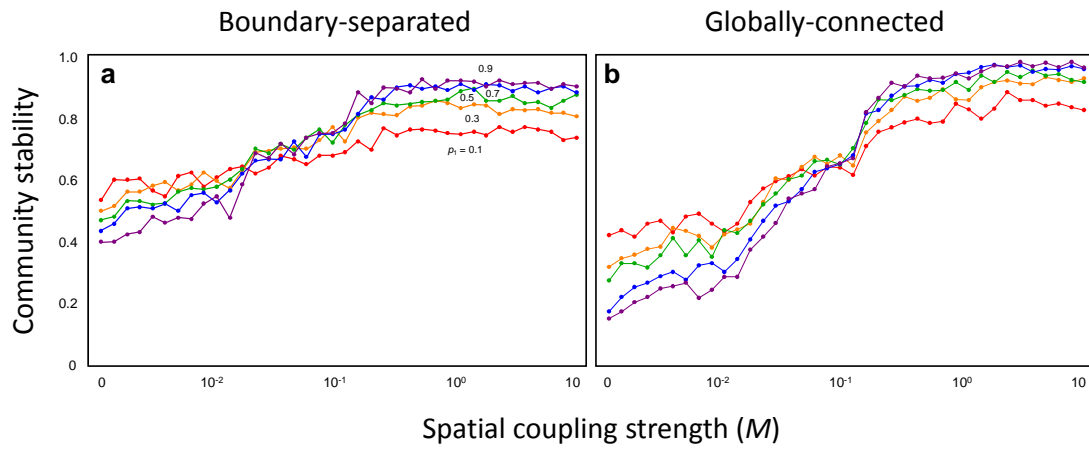

**Fig. S6.** Relationships between spatial coupling strength and stability with varying  $q_1$ . (a) Boundary-separated subsystems. (b) Globally-connected subsystems. Other information is the same as in Fig. 2a, b.

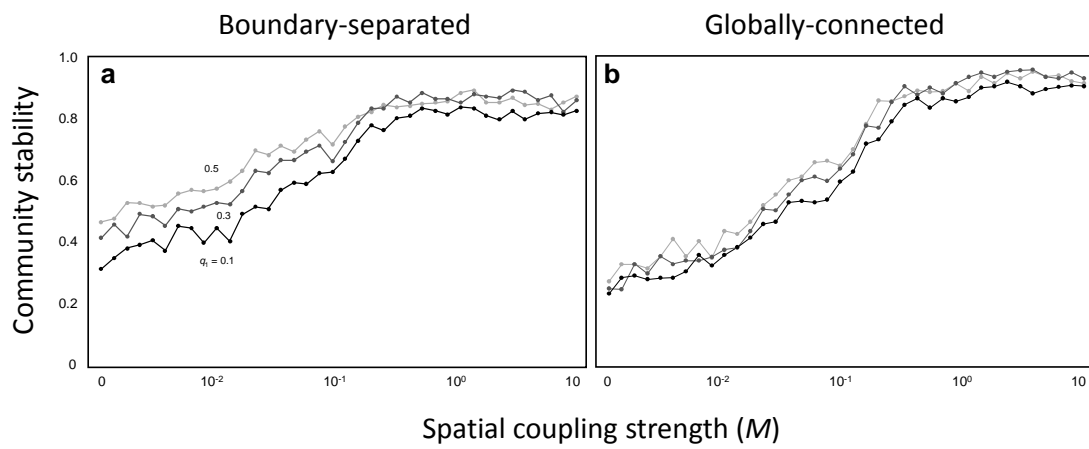

Supplement: 41598_2018_34716_MOESM1_ESM.pdf [file 41598_2018_34716_MOESM1_ESM.pdf]
